## 24 Abstract

25 Diagnostics has played a significant role in effective management of severe acute respiratory  
26 syndrome coronavirus 2 (SARS-CoV-2). Nucleocapsid protein (N protein) is the primary  
27 antigen of the virus for development of sensitive diagnostic assays. Thus far, limited knowledge  
28 exists about the antigenic properties of the N protein. In this paper, we demonstrate the  
29 significant impact of dimerization of SARS-CoV-2 nucleocapsid protein on sensitivity of  
30 enzyme-linked immunosorbent assay (ELISA) based diagnostics of COVID-19. The expressed

31 purified protein from  
32 *E.coli* consists of two  
33 forms, dimeric and  
34 monomeric forms,  
35 which have been  
36 further characterized  
37 by biophysical and

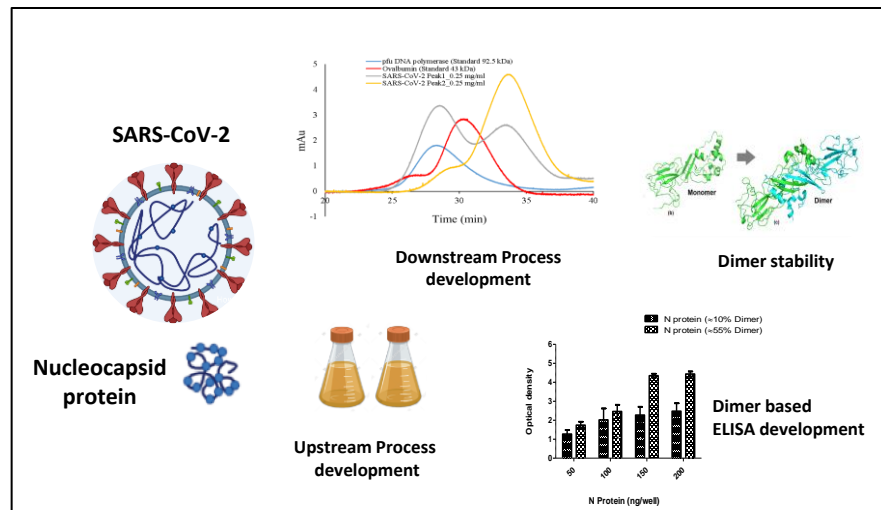

38 immunological means. Indirect ELISA indicated elevated susceptibility of the dimeric form of  
39 the nucleocapsid protein for identification of protein-specific monoclonal antibody as  
40 compared to the monomeric form of the protein. These findings have also been confirmed with  
41 the modelled structure of monomeric and dimeric nucleocapsid protein *via* HHPred software  
42 and its solvent accessible surface area, which indicates higher stability and antigenicity of the  
43 dimeric type as compared to the monomeric form. It is evident that use of the dimeric form will  
44 increase the sensitivity of the current nucleocapsid dependent ELISA for rapid COVID-19  
45 diagnostic. Further, the results indicate that monitoring and maintaining of the monomer-dimer  
46 composition is critical for accurate and robust diagnostics.

47

48

## 49 **Introduction**

50 COVID-19 is a widespread global pandemic that has significantly damaged the financial  
51 stability and access to treatment for many, especially our most marginalized societies<sup>1-3</sup>.  
52 Diagnostics has played a major role in managing the pandemic, with most tests serving as an  
53 indicator of transmission at the time when the virus is in the upper respiratory tract<sup>4</sup>. However,  
54 detection of pathogen-specific antibodies that develop within days of infection is also a durable  
55 biomarker of prior exposure. The antibody-based assay has also been useful in identifying those  
56 who have been exposed to the virus<sup>5,6</sup>.

57 The SARS-CoV-2 genome is composed of approximately 30,000 nucleotides, which encodes  
58 four structural proteins including spike (S) protein, envelope (E) protein, membrane (M)  
59 protein, and nucleocapsid (N) protein. SARS-CoV-2 N protein is a ~45.6 kDa phosphoprotein,  
60 comprising of a N-terminal domain (NTD) and a C-terminal domain (CTD), connected by a  
61 loosely structured linkage region containing a serine/arginine-rich (SR) domain<sup>7,8</sup>. The residues  
62 from 45 to 181 of the NTD are responsible for the binding of viral RNA to the N protein. SR  
63 area linking the NTD and CTD is the site of phosphorylation which is assumed to control N  
64 protein performance<sup>9</sup>. Hydrophobic CTD of the N protein contains residues responsible for the  
65 homodimerization of the N protein<sup>10-13</sup>. Homodimers of N protein are recorded to self-assemble  
66 into higher-order oligomeric complexes, possibly through cooperative interactions of  
67 homodimers<sup>14</sup>. Development of higher-order oligomeric complexes requires both dimerization  
68 domain and the expanded asymmetric moiety of the CTD<sup>8,15,16</sup>.

69 Upon SARS-CoV-2 infection, viral genomic RNA gets associated with the N protein to  
70 develop a ribonucleoprotein complex. This complex then packages itself into a helical  
71 conformation and combines itself with the M protein of the virion<sup>7</sup>. Despite being present  
72 within the viral particle and not very exposed to the surface, SARS-CoV-2 infected patients

73 show elevated and earlier humoral response to the N protein rather than the spike<sup>17</sup>. This is the  
74 reason why the N protein is being widely used in vaccine development and serological assays<sup>17-</sup>  
75 <sup>19</sup>. It has been shown for SARS-CoV that the C-terminal region of the N protein is crucial for  
76 eliciting antibodies in immunological process<sup>20</sup>. Most diagnostic assays are based on the  
77 antigenic proteins, either N or S protein, of the SARS-CoV-2<sup>21-27</sup>. Several formats of ELISA  
78 have been developed to detect IgM/IgG antibodies in a patient's serum against the SARS-CoV-  
79 2 N protein<sup>28,29</sup>.

80         Structural study of the full-length coronavirus N protein expressed in *Escherichia coli*  
81 is complicated since the recombinant N protein is very susceptible to proteolysis.<sup>30</sup> As a result,  
82 minimal information exists on the structure of the SARS-CoV-2 N protein monomer and its  
83 assembly into higher-order complexes. In this study, full-length protein of SARS-CoV-2 was  
84 successfully expressed in *E. coli* BL21 (DE3) as aggregated inclusion bodies. Two major peaks  
85 of the N protein were identified as a monomeric and dimeric conformation *via* size exclusion  
86 chromatography coupled with multi-angle static light scattering (MALS), circular dichroism  
87 (CD), and fluorescence spectroscopy. Further, the antigenicity of these conformations was  
88 compared through a highly sensitive and precise ELISA-based antibody test. The epitope and  
89 solvent accessibility of the monomer and dimer forms of the N protein was also predicted using  
90 bioinformatics tools to study the structural stability and antigenicity of these conformations. It  
91 is evident that use of the dimeric form will increase the sensitivity of the current nucleocapsid  
92 dependent ELISA for rapid COVID-19 diagnostic. Further, the results indicate that monitoring  
93 and maintaining of the monomer-dimer composition is critical for accurate and robust  
94 diagnostics. To the best of our knowledge this is the first in-depth investigation into impact of  
95 dimerization of SARS-CoV-2 nucleocapsid protein on sensitivity of enzyme-linked  
96 immunosorbent assay (ELISA) based diagnostics of COVID-19.

## 97 **Results**

98 **Expression and purification of SARS-CoV-2 N protein.** Full-length N protein gene construct  
99 was transformed into *E. coli* BL21 (DE3) cells. Robust expression of the full-length N protein  
100 was observed in the SDS-PAGE (Figure 1a). The protein band with the molecular weight of  
101 about 51.38 kDa represents the full-length N protein expressed as IBs. The protein was further  
102 confirmed with immunoblotting using protein-specific antibody (figure 1b). Protein expression  
103 was later scaled-up in a bioreactor and a batch fermentation of transformed *E. coli*. BL21 (DE3)  
104 was performed with 10 g L<sup>-1</sup> (v/v) of glycerol as a carbon source. Upon completion of batch, a  
105 DO shoot was observed (Figure S1) and feeding of 200 g L<sup>-1</sup> (v/v) of the glycerol along with  
106 1% (w/v) yeast extract was given to the bioreactor. Glycerol feeding resulted in attainment of  
107 higher cell density. Protein expression was induced by 1 mM IPTG at an optical density of 35  
108 for 8 h. Biomass of about 20.3 g L<sup>-1</sup> was generated in the fermentation batch of bioreactor. Due  
109 to overexpression of heterologous protein, product was accumulated in the form of IBs within  
110 the cytoplasm of the bacterial cell with a yield of about 6.25 g L<sup>-1</sup>.

111 The inclusion bodies were solubilised, and the protein was captured using SP Sepharose FF  
112 resin and purified using CEX chromatography (figure 2a). SARS-CoV-2 N protein of more  
113 than 95% purity was thus obtained (Figure 1c) and confirmed with immunoblotting (Figure  
114 1d). Further, preparative SEC was performed to obtain fractions containing 5%, 10%, 25%,  
115 55%, 75% dimer (figure 2b,c,d,e,f). Since it is impossible to distinguish the complete dimer  
116 from the monomer, fractions with the greatest possible dimer content were used in this analysis.  
117 N protein monomer and dimer rich pools were used for structural characterization and  
118 determination of ELISA sensitivity.

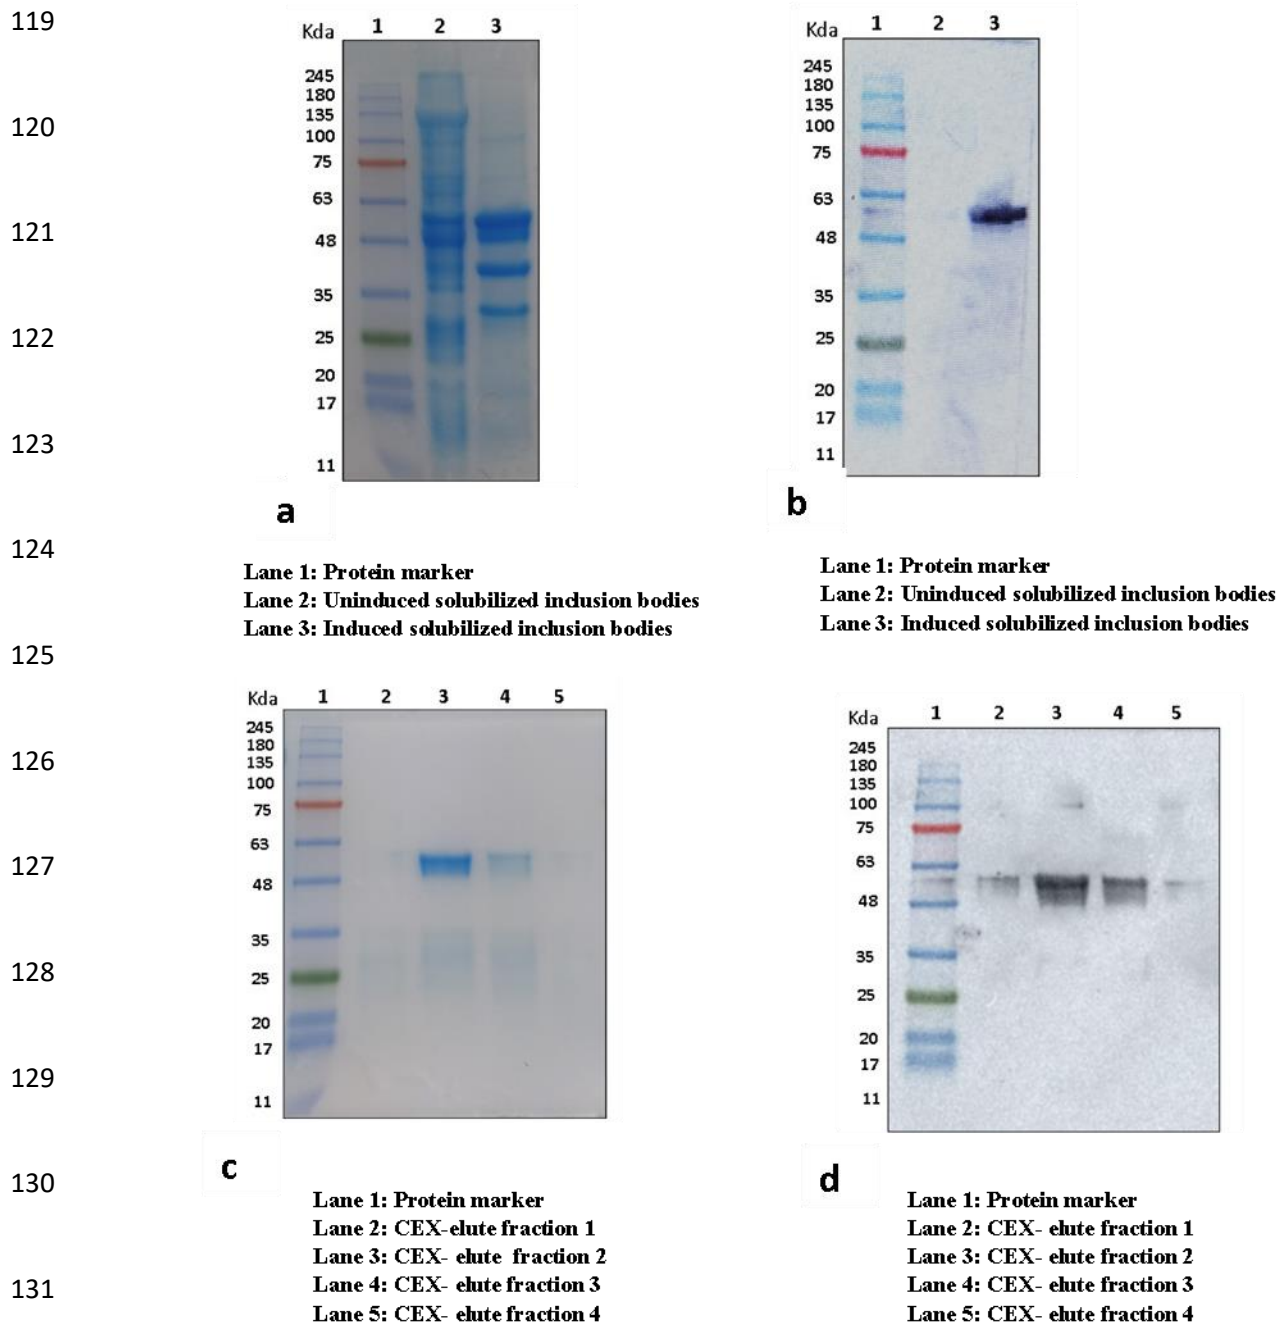

**Figure 1 Nucleocapsid protein expression and purification.** SDS-PAGE (10%) of expressed N protein (a). Immunoblotting of N protein (b). Coomassie staining of purified N protein fractions (c). Immunoblotting of purified N protein fraction using nucleocapsid specific antibody (d).

138 **Characterization of SARS-CoV-2 N protein.** Purified SARS-CoV-2 N protein was analysed  
139 by SDS-PAGE, the band was excised and digested with trypsin. The proteolytic digested  
140 peptides were analysed using LC-MS. The sequence coverage of the digested protein showed  
141 85.5 % sequence coverage in comparison to in silico digested protein (Figure S2). SEC-MALS  
142 of the N protein showed the monomer and dimer fractions to have molecular masses of 51.38  
143 kDa

144

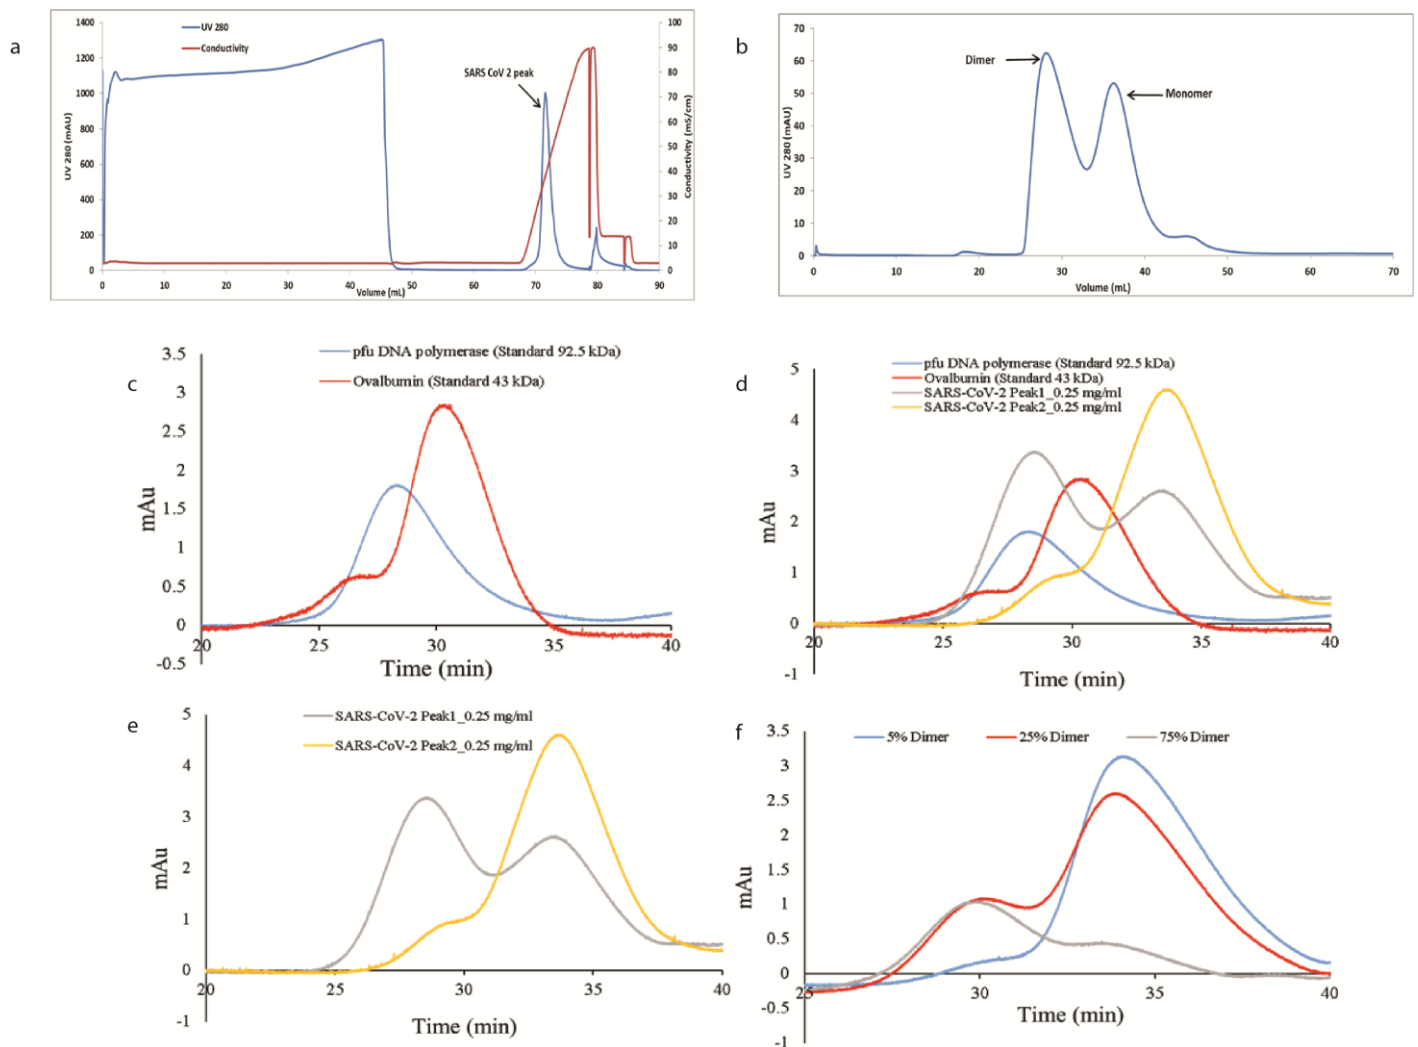

145

146 **Figure 2:** Chromatogram of CEX chromatography (a) and preparative SEC chromatography  
147 (b) of Nucleocapsid protein of SARS-CoV-2. Chromatogram of analytical SEC  
148 chromatography (c) Standard protein of size 43Kda and 92.5 KDa (d) overlay of purified N

149 and standard protein **(e)** Purified N protein alone **(f)** Purified N protein of different fraction of  
150 dimer (10%, 25% and 75%)  
151 and 108 kDa respectively (Figure 3a and b). Further, purified SARS-CoV-2 protein was  
152 characterized for secondary structure by CD spectroscopy (Figure 3c). It was observed that  
153 SARS-CoV-2 mainly consists of random coils as shown by the negative band at ~ 200 nm,  
154 which is consistent with reports in literature<sup>31</sup>. As is evident from data presented in figure 3c,  
155 both the monomer and dimer primarily consist of random coils. In dimer form, there is an  
156 increase in ellipticity at 218 nm, as well as a red shift in the negative band from 200 nm to 202  
157 nm, suggesting an improved secondary structure due to oligomerization. Conformational state  
158 of SARS-CoV-2 was estimated by fluorescence spectroscopy with tryptophan excitation at 285  
159 nm and emission in the range of 300-500 nm. Fluorescence spectra shows  $\lambda_{\max}$  of ~334 nm  
160 (Figure 3d), indicating that the native structure of SARS-CoV-2 protein is similar to that  
161 reported for the SARS-CoV N protein<sup>16</sup>. Fluorescence spectra of dimer fraction exhibited a red  
162 shift in  $\lambda_{\max}$  from 334 nm to 340 nm, indicating exposure of the buried tryptophan and resulting  
163 in oligomerization of the protein.



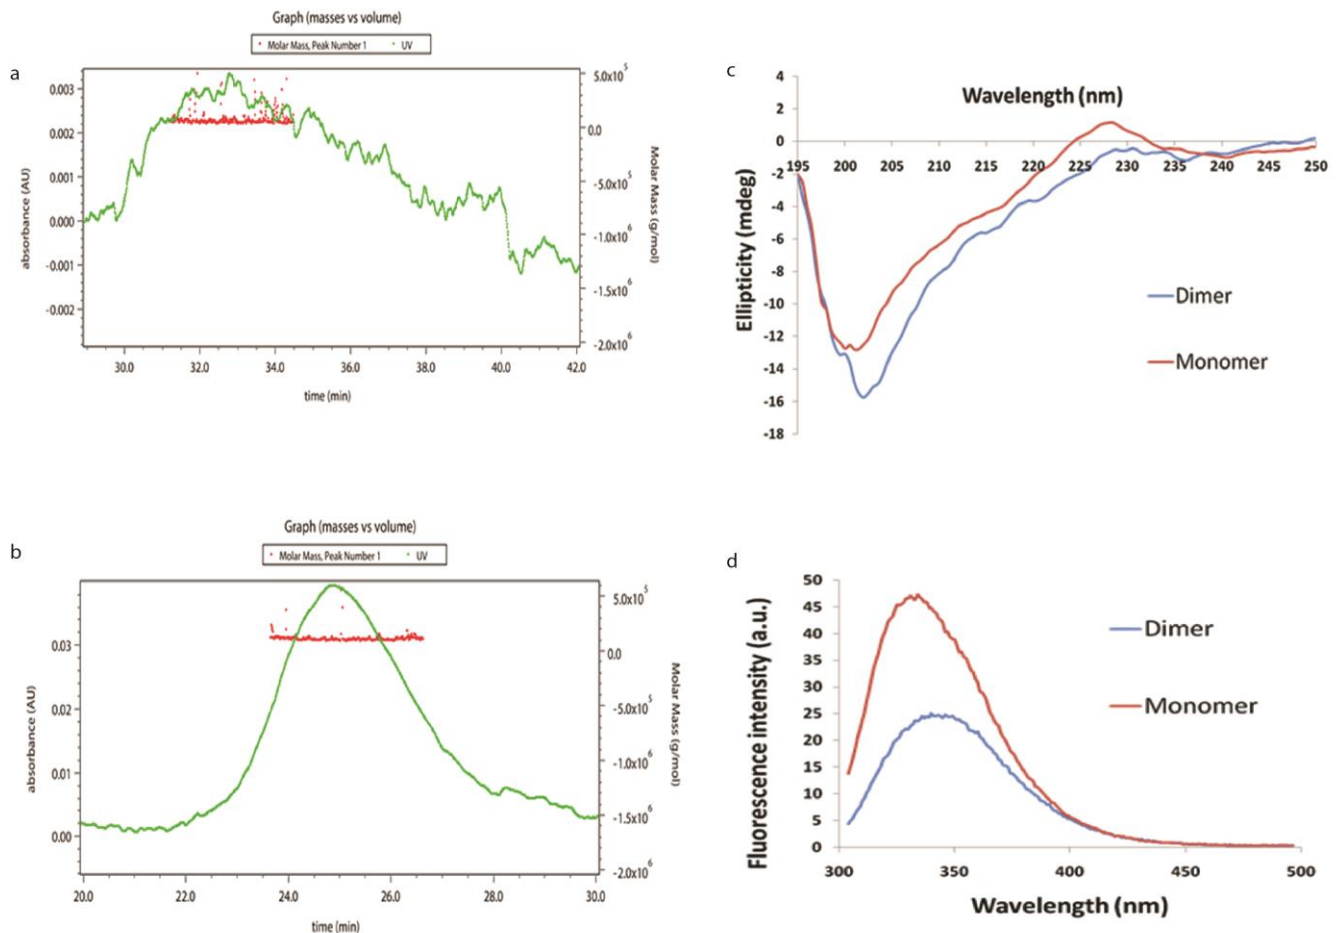

164

165 **Figure 3:** Characterization of monomer and dimer form of the N protein. SEC-MALS of  
166 SARS-CoV-2 nucleocapsid monomer (a) and dimer form of the protein (b). Far-UV Circular  
167 Dichroism spectra of N protein of SARS-CoV-2 at 0.25 mg/ml concentration (c). Fluorescence  
168 spectra of N protein of SARS-CoV-2 at 0.25 mg/ml concentration (d).

169 **Modelling of the structure of the monomeric/ dimeric forms.** The SARS-CoV-2 N protein  
170 sequence was retrieved from the Uniprot database. It comprises of 419 amino acid residues.  
171 The current experimental structure contains 30-40% of these residues, rendering it the only  
172 structure known for the virus. Sequence alignment showed different potential templates  
173 covering the various segments of the protein. Figure 4a shows the coverage of SARS-CoV-2  
174 N protein sequence by different proteins in the sequence alignment. MERS CoV nucleocapsid

175 (PDB: 4UD1) aligned best with the query sequence with  $1e-58$  E-value and covers 14-164  
176 sequence. Fragment length 244-364 amino acids for SARS-CoV-2 N protein was  
177 experimentally solved and used as a second template (PDB: 6WZO). Selected templates (4UD1  
178 and 6WZO) were used in modeller to build the model. This modelled the structure of SARS-  
179 CoV-2 N protein in its monomeric form as shown in Figure 4b. Later, this monomeric form  
180 was superimposed with the partial experimental structure of the dimerization domain of SARS-  
181 CoV-2 N protein (6WZO). Transposing the two units of modelled monomers to the  
182 dimerization domain resulted in formation of the dimeric form of the protein as shown in figure  
183 4c.

184 **Calculation of the solvent accessible surface area (SASA).** SASA was calculated for each  
185 residue in monomer and dimer form. This indicates the amount of area for a residue that is  
186 exposed to the solvent. Hydrophobic residues do not prefer polar environment and thus bury  
187 themselves in the native structure of the protein. Hydrophobic residues that show  $>50\text{\AA}^2$  SASA  
188 value in monomer indicate probable surface instability. These residues were marked and their  
189 corresponding percentage change in dimeric form was calculated. Figure 4d shows the  
190 percentage change of these hydrophobic residues between the monomer and the dimer. Six  
191 such residues, namely A183, V182, I283, L271, I269, and I289, changed from completely  
192 exposed to buried state in dimeric form. Moreover, A268 buried by 60% while A243 and I194  
193 buried by  $\approx 35\%$  compared to their monomeric conformation. This indicates that dimerization  
194 of protein helped to bury these hydrophobic residues at the interface that can stabilize the  
195 protein in the solution.

196 **Prediction of epitopes.** The 3D structure of a protein can be used to predict discontinuous  
197 epitopes. These epitopes are formed due to specific conformation of protein residues at the  
198 surface. To classify these discontinuous epitopes, many methods are used to evaluate monomer

199 and dimer. Ellipro predicted 3 epitopic sites on the monomer surface and 6 epitopes for the  
200 dimer form. These 6 predicted epitopes for the dimer SARS-CoV-2 N are the duplicate of its  
201 corresponding monomer and hence improve the chance of antibody binding. Among the  
202 predicted discontinuous 3D epitopes, patch 1:“R41, P42, Q43, G44, L45, P46, N47, N48, T49,  
203 A50, S51, W52, F53, T54, A55, E62, D63, L64, K65, F66, P67, G69, Q70, G71, V72, P73,  
204 I74, N75, T76, N77, S78, S79, P80, D81, D82, Q83, I84, Y112, L113, G114, T115, P122,  
205 Y123, G124, A125, V133, A134, T135, E136, G137, A138, L139, N140, T141, P142, K143,  
206 D144, H145, I146, G147, T148, R149, N150, P151, A152, N153, N154, A155, A156, I157,  
207 V158, L159, Q160, L161, P162, Q163, G164, T165, T166, L167, P168, K169, Y172, A173,  
208 E174, G175, Q176, T177, T257, P258, S259, G260”has the maximum score and it is present  
209 in duplicate for the dimeric form. A complete list of the epitopes predicted by Ellipro is given  
210 in Table 1. Further, a similar analysis was performed with the DiscoTope server, which  
211 predicted the probability of each residue to be part of an epitope. It predicted 110 residues at  
212 the epitopic site at the DiscoTope threshold score ‘0’. However, dimer has 238 B-cell epitope  
213 residues out of 576 residues. A list of the predicted epitope residues is shown in Supplementary  
214 Table S1. Both the servers suggested that dimer has a greater number of structural epitopes and  
215 may have more affinity for antibodies.

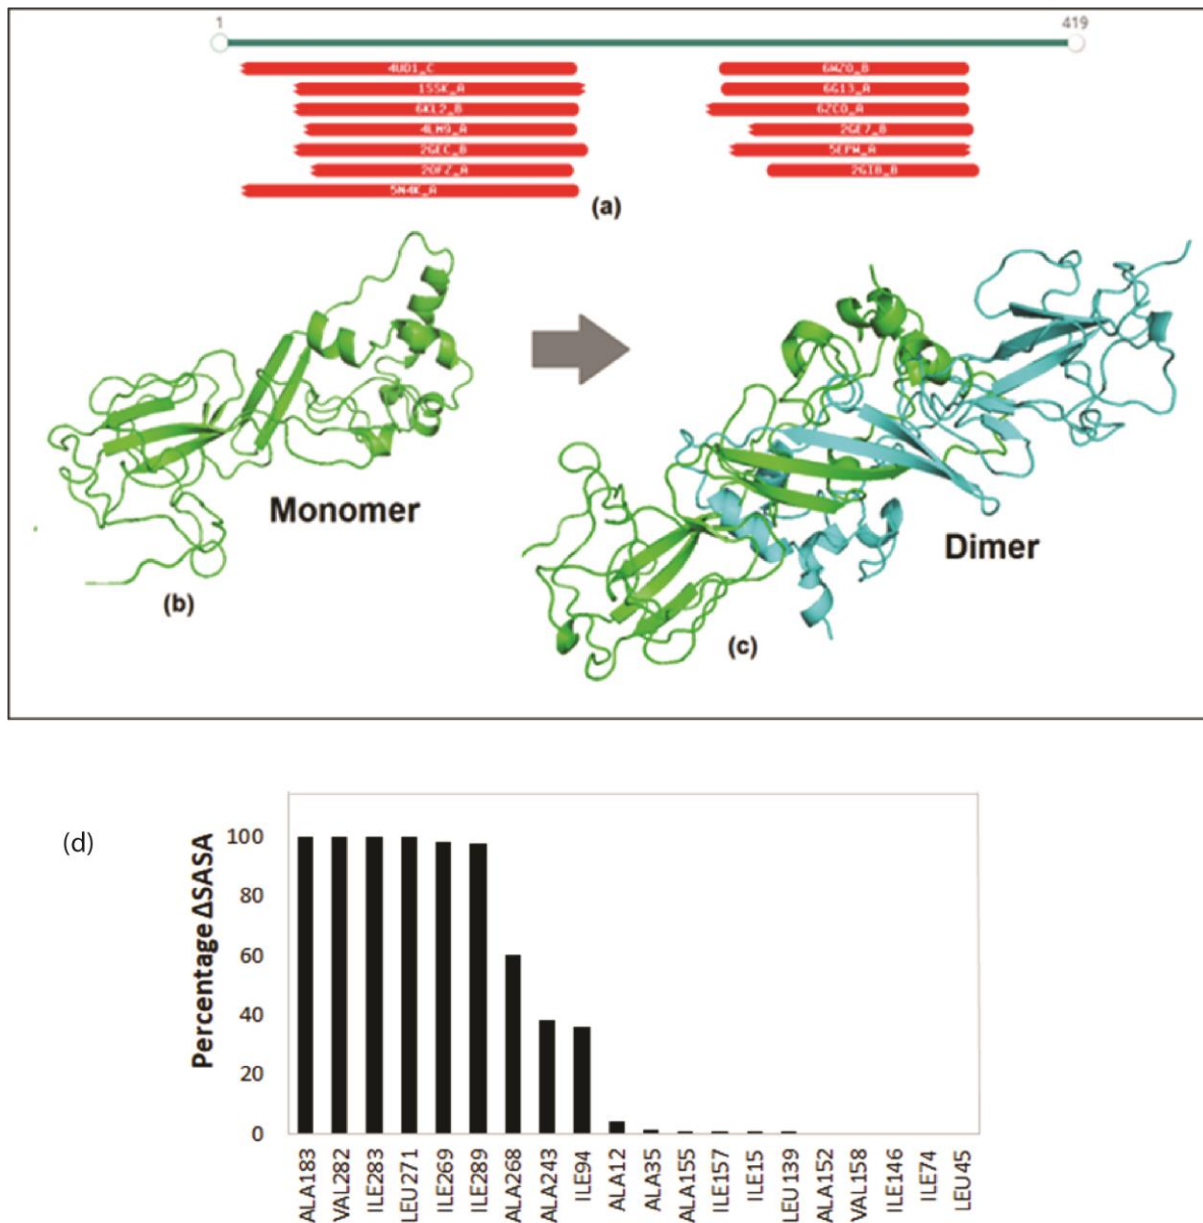

216

217 **Figure 4** Structure modelling of SARS-CoV-2 N protein (a) sequence alignment of SARS-  
218 CoV-2 N protein with known structures (b) monomer modelled structure built on 4UD1 and  
219 6WZO templates (c) dimeric form of protein built using 6WZO dimerization domain.  
220 Percentage change in solvent accessible surface area (SASA) for hydrophobic residues between  
221 monomer and dimer form of SARS-CoV-2 N protein (d).

222

223

224 **Table 1.** Discontinuous epitopes predicted by Ellipro server for the monomeric and dimeric  
 225 form of SARS-CoV-2 N protein.

| MONOMER (Chain A)                                                                                                                                                                                                                                                                                                                                                                                                                                                                                                                                                                                                                                                                                                         |                    |       |
|---------------------------------------------------------------------------------------------------------------------------------------------------------------------------------------------------------------------------------------------------------------------------------------------------------------------------------------------------------------------------------------------------------------------------------------------------------------------------------------------------------------------------------------------------------------------------------------------------------------------------------------------------------------------------------------------------------------------------|--------------------|-------|
| Residues                                                                                                                                                                                                                                                                                                                                                                                                                                                                                                                                                                                                                                                                                                                  | Number of residues | Score |
| A:R194, A:T195, A:A196, A:T197, A:K198, A:A199, A:Y200, A:N201, A:T203, A:Q204, A:G207, A:R208, A:R209, A:G210, A:P211, A:E212, A:Q213, A:T214, A:Q215, A:N217, A:G219, A:D220, A:Q221, A:E222, A:L223, A:I224, A:R225, A:Q226, A:G227, A:T228, A:D229, A:Y230, A:K231, A:H232, A:W233, A:P234, A:Q235, A:I236, A:A237, A:Q238, A:F239, A:A240, A:P241, A:S242, A:S244, A:A245, A:G248, A:M249, A:S250, A:G267, A:A268, A:I269, A:K270, A:L271, A:D272, A:D273, A:K274, A:D275, A:P276, A:N277, A:F278, A:K279, A:D280, A:Q281, A:V282, A:I283, A:L284, A:L285, A:N286, A:K287, A:D290, A:A291, A:Y292, A:K293, A:T294, A:F295, A:P296                                                                                    | 77                 | 0.645 |
| A:F53, A:T54, A:E62, A:D63, A:L64, A:K65, A:F66, A:P67, A:G69, A:Q70, A:G71, A:V72, A:P73, A:I74, A:N75, A:T76, A:N77, A:S78, A:S79, A:P80, A:D81, A:D82, A:Q83, A:A134, A:T135, A:E136, A:G137, A:A138, A:L139, A:N140, A:T141, A:R149, A:N150, A:P151, A:A152, A:N153, A:N154, A:A155, A:A156, A:I157, A:V158, A:L159, A:Q160, A:L161, A:P162, A:Q163, A:G164, A:T165, A:T166, A:L167, A:P168, A:K169                                                                                                                                                                                                                                                                                                                   | 52                 | 0.613 |
| A:G96, A:G97, A:D98, A:G99, A:K100, A:M101, A:K193                                                                                                                                                                                                                                                                                                                                                                                                                                                                                                                                                                                                                                                                        | 7                  | 0.505 |
| DIMER (Chain A and B)                                                                                                                                                                                                                                                                                                                                                                                                                                                                                                                                                                                                                                                                                                     |                    |       |
| Residues                                                                                                                                                                                                                                                                                                                                                                                                                                                                                                                                                                                                                                                                                                                  | Number of residues | Score |
| A:R41, A:P42, A:Q43, A:G44, A:L45, A:P46, A:N47, A:N48, A:T49, A:A50, A:S51, A:W52, A:F53, A:T54, A:A55, A:E62, A:D63, A:L64, A:K65, A:F66, A:P67, A:G69, A:Q70, A:G71, A:V72, A:P73, A:I74, A:N75, A:T76, A:N77, A:S78, A:S79, A:P80, A:D81, A:D82, A:Q83, A:I84, A:Y112, A:L113, A:G114, A:T115, A:P122, A:Y123, A:G124, A:A125, A:V133, A:A134, A:T135, A:E136, A:G137, A:A138, A:L139, A:N140, A:T141, A:P142, A:K143, A:D144, A:H145, A:I146, A:G147, A:T148, A:R149, A:N150, A:P151, A:A152, A:N153, A:N154, A:A155, A:A156, A:I157, A:V158, A:L159, A:Q160, A:L161, A:P162, A:Q163, A:G164, A:T165, A:T166, A:L167, A:P168, A:K169, A:Y172, A:A173, A:E174, A:G175, A:Q176, A:T177, A:T257, A:P258, A:S259, A:G260 | 92                 | 0.68  |
| B:R41, B:P42, B:Q43, B:G44, B:L45, B:P46, B:N47, B:N48, B:T49, B:A50, B:S51, B:W52, B:F53, B:T54, B:A55, B:E62, B:D63, B:L64, B:K65, B:F66, B:P67, B:G69, B:Q70, B:G71, B:V72, B:P73, B:I74, B:N75, B:T76, B:N77, B:S78, B:S79, B:P80, B:D81, B:D82, B:Q83, B:I84, B:Y112, B:L113, B:G114, B:T115, B:P122, B:Y123, B:G124, B:A125, B:V133, B:A134, B:T135, B:E136, B:G137, B:A138, B:L139, B:N140, B:T141, B:P142, B:K143, B:D144, B:H145, B:I146, B:G147, B:T148, B:R149, B:N150, B:P151, B:A152, B:N153, B:N154, B:A155, B:A156, B:I157, B:V158, B:L159, B:Q160, B:L161, B:P162, B:Q163, B:G164, B:T165, B:T166, B:L167, B:P168, B:K169, B:Y172, B:A173, B:E174, B:G175, B:Q176, B:T177, B:T257, B:P258, B:S259, B:G260 | 92                 | 0.678 |
| A:R194, A:T195, A:A196, A:T197, A:Y200, A:N201, A:T203, A:Q204, A:G207, A:R208, A:R209, A:G210, A:P211, A:E212, A:Q213, A:T214, A:Q215, A:G216, A:N217, A:D220, A:Q221, A:R225, A:Q226, A:D229, A:Y230, A:D290, A:Y292, A:K293, A:T294, A:F295, A:P296                                                                                                                                                                                                                                                                                                                                                                                                                                                                    | 31                 | 0.529 |
| B:R194, B:T195, B:A196, B:T197, B:Y200, B:N201, B:T203, B:Q204, B:G207, B:R208, B:R209, B:G210, B:P211, B:E212, B:Q213, B:T214, B:Q215, B:G216, B:N217, B:D220, B:Q221, B:R225, B:Q226, B:D229, B:Y230, B:D290, B:Y292, B:K293, B:T294, B:F295, B:P296                                                                                                                                                                                                                                                                                                                                                                                                                                                                    | 31                 | 0.528 |
| A:D272, A:D273, A:K274                                                                                                                                                                                                                                                                                                                                                                                                                                                                                                                                                                                                                                                                                                    | 3                  | 0.508 |
| B:D272, B:D273, B:K274                                                                                                                                                                                                                                                                                                                                                                                                                                                                                                                                                                                                                                                                                                    | 3                  | 0.508 |

226

227 **Enzyme-linked immunosorbent assay.** Antigenic response of the monomeric and dimeric  
 228 form of the N protein was evaluated through indirect ELISA using monoclonal antibody  
 229 targeted against nucleocapsid of SARS-CoV-2. In order to improve the assay performance, a

230 systemic perusal of each step of the ELISA was performed. Variables such as antigen-coating  
231 concentration and primary antibody dilution were optimized. Four concentrations of N protein  
232 monomer and dimer fractions (50-200 ng well<sup>-1</sup>) were coated on the 96-well polystyrene plate.  
233 As illustrated in Figure 5b, at a protein concentration of 150 ng well<sup>-1</sup>, dimeric fraction of the  
234 N protein was clearly superior for anti-N IgG detection. Following antigen-coating, an ideal  
235 primary antibody dilution was tested. Six-two-fold dilutions of primary antibody were  
236 generated for the detection of coated N-protein monomer and dimer. Initially, antigen detection  
237 was increased with the increase in primary antibody dilution. The detectability saturated at a  
238 dilution of 1:3000 dilution and upon further increase in the dilution of the primary antibody,  
239 the detection worsened as shown in Figure 5a. Owing to the superior antigenicity of the dimeric  
240 form of the N protein, impact of increasing percentage of dimer in the solution on its  
241 immunogenicity was further examined. Samples containing different percentages of N protein  
242 dimers (10-75%) were coated on the polystyrene plate and were detected by primary antibody  
243 (anti-N IgG, 1:3000). It can be inferred from Figs. 5b and 5c that as the percentage of the dimers  
244 increased in the solution, the sensitivity of the assay increased as well (p value <0.05).

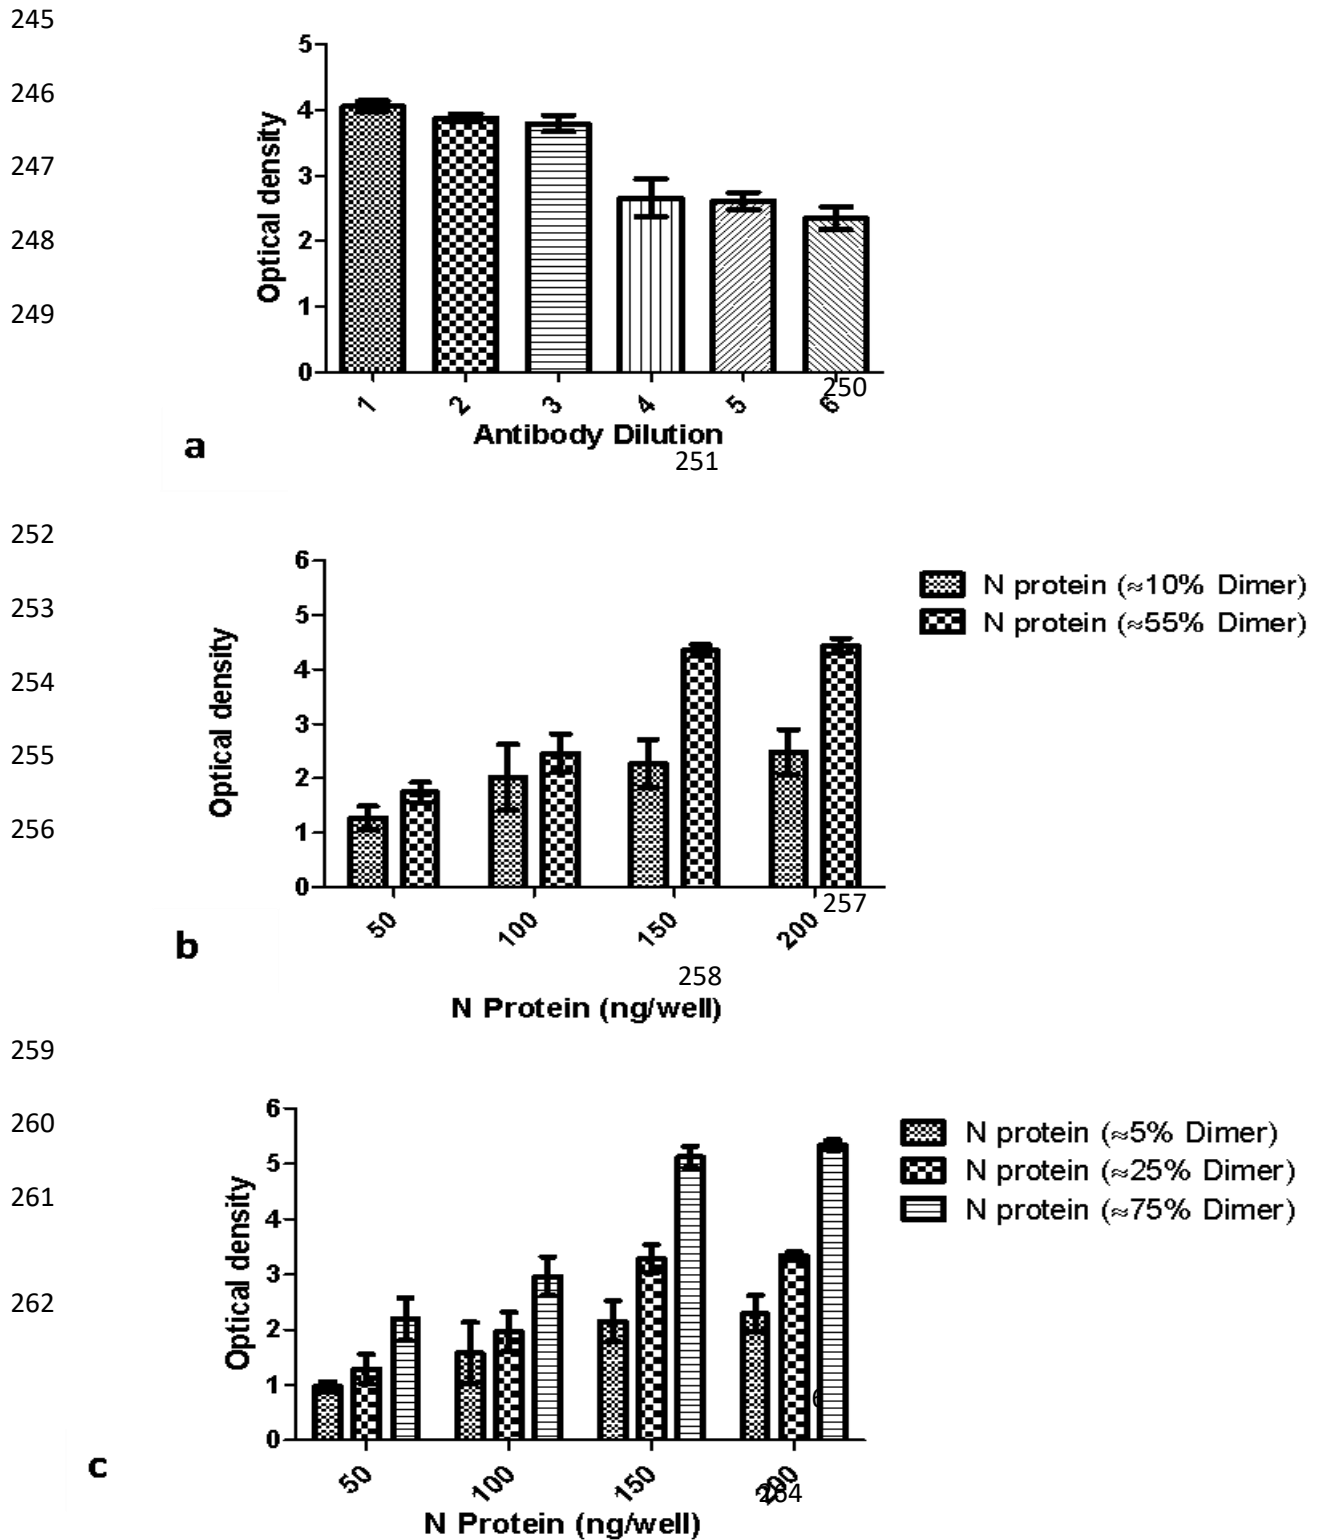

265  
266 **Figure 5** Indirect ELISA based on N protein. **(a)** Standardization of antibody dilution **(b)**  
267 ELISA based on increasing amount of N protein dimer of fraction 10% and 55% **(c)** ELISA on  
268 increasing amount of N protein dimer fraction of 5%, 25% and 75%.



269 **Discussion:** The SARS-CoV-2 nucleocapsid protein antibody is more sensitive than the spike  
270 protein antibody for ELISA based identification of early infections<sup>32</sup>. N protein is a highly  
271 immunogenic and generously expressed protein during infection of SARS-CoV-2. High levels  
272 of anti-N protein antibodies have been detected in sera in patients with prior infection of SARS-  
273 CoV-2. SARS-CoV-2 N protein is a highly basic protein with a pI of 10.0. The nucleocapsid  
274 is a multifunctional protein that interacts with RNA and other membrane proteins during virus  
275 assembly. Researchers have reported that homodimers of the full-length N protein are the  
276 fundamental unit of the ribonucleoprotein complex<sup>33</sup>.

277 In the present study, we purified monomeric and dimeric form of the nucleocapsid protein. The  
278 dimer and monomer ratio did not change in the concentration range under consideration.  
279 Samples rich in monomeric or dimeric forms were used to investigate the antigenic sensitivity  
280 to the SARS-CoV-2 nucleocapsid. The highest-grade dimer fraction of the N protein  
281 demonstrated high sensitivity and a wider dynamic range for antibody detection. Later, we  
282 investigated the phenomenon of high sensitivity of dimer using computational approach.  
283 Structures of N protein were modelled in their monomeric and dimeric forms. Solvent  
284 accessibility of hydrophobic residues was found to be lower in the dimeric form, thereby  
285 indicating better surface stability for dimer in polar solution. Additionally, 3D epitopes were  
286 predicted to find the potential of binding of the monomeric and the dimeric species with the  
287 antibody. Dimer species exhibited double the number of epitopes compared to the monomer,  
288 thereby enhancing the chances to interact with the antibody, an observation supported by  
289 experimental data.

290 This is the first of its kind study, elucidating the impact of dimerization of SARS-CoV-2  
291 nucleocapsid protein on sensitivity of enzyme-linked immunosorbent assay (ELISA) based  
292 diagnostics of COVID-19. The optical density calculation in the ELISA assay improved when  
293 a high proportion of the dimeric fraction was used as antigen. Thus, further modification of



294 existing assays for the detection of SARS-CoV-2 antibodies and use of a high proportion of  
295 full-length nucleocapsid fragment dimer can further enhance the sensitivity of the existing  
296 rapid kit and ELISA assay.

## 297 **Methods**

298 **Construct and expression of SARS-CoV-2 N protein.** *Escherichia coli* BL21 (DE3)  
299 purchased from Novagen – Merck Life Science Private Limited, India (Cat. No.69450-4), was  
300 used in the current study. The expression construct of SARS-CoV-2 N protein was  
301 commercially procured through Addgene in a pGBW-m4046785 vector with N protein gene  
302 insert of 1253 bp under the control of T7 promoter. The expression construct was transformed  
303 in *E.coli* BL21 (DE3) strain and bacterial culture was grown in terrific broth at 37.0 °C in the  
304 presence of 25 µg mL<sup>-1</sup> chloramphenicol. When the O.D. at 600 of primary culture reached up  
305 to 1.0 ± 0.2, the secondary culture (100.0 ml) was inoculated with 5.0 ml of primary seed  
306 culture. Bacterial cultivations were carried out at 37.0 °C. 1.0 mM isopropyl β-D-1-  
307 thiogalactopyranoside (IPTG) was used to induce the secondary culture in the mid-log phase.  
308 Cells were harvested after 12 hours of induction and subjected to primary downstream  
309 processing steps to confirm protein expression.

310 **Production of SARS-CoV-2 N protein in bioreactor.** Protein expression was scaled-up in a  
311 1.3 L bioreactor (Eppendorf, USA) with 0.5 L initial volume. Gas flow rate was maintained  
312 between 0.5-1.5 vvm (0.5-0.6 Lmin<sup>-1</sup>) by the mass flow controller. The pH of the media was  
313 monitored by a pH probe and maintained at 7.0±0.2 by using 3 N phosphoric acid and 12.5%  
314 ammonia. Temperature was maintained at 37.0 °C. Dissolved oxygen of the batch was  
315 controlled at 30% saturation by cascading the stirrer speed between 300-900 rpm. Bioreactor  
316 was monitored and controlled by the Biocommand software (Eppendorf, USA). Fed batch  
317 media containing glycerol (200 g L<sup>-1</sup>, v/v) and yeast extract (1%, w/v) was continuously fed to  
318 the bacterial culture in order to enhance the biomass. Protein expression was induced with 1

319 mM IPTG for 8 h and cells were harvested by centrifugation at 8000 rpm for 15 min. Cell pellet  
320 was washed with 0.9% (w/v) NaCl, resuspended in lysis buffer (20 mM Tris-HCL, 150 mM  
321 NaCl, 0.5 mM EDTA, pH 8.0), lysed using an Ultrasonicator system (Oscar Ultrasonics Pvt.,  
322 Ltd., India) for 30 min with 30s on/off (50% duty cycle). Lysed cells were then centrifuged at  
323 7000 rpm for 15 min at 4°C, supernatant was discarded, and the obtained IBs were washed  
324 twice with saline. Protein expression was analysed through SDS-PAGE.

325 **Purification of SARS-CoV-2 N protein.** IBs were solubilized in 100 mM Tris-HCl buffer  
326 containing 6 M urea (pH 8.0) for 2 hours. The solution was then centrifuged and supernatant  
327 was collected. To prepare CEX load, the pH was adjusted to 7.0 using acetic acid and  
328 conductivity was adjusted to <3.0 mS/cm using deionised water. The CEX column (SP  
329 Sepharose FF, Cytiva USA) was equilibrated with 20 mM phosphate buffer (pH 7.0) and the  
330 load was pumped on the CEX column at 5 min retention time. The bound N protein was eluted  
331 using 1 M NaCl in 20 mM phosphate buffer (pH 7.0). This purification step also doubled as an  
332 on-column refolding step for the N protein. The elute contained a mixture of monomer and  
333 dimer of the protein which was separated using preparative SEC (Superdex 200, Cytiva USA).  
334 Phosphate buffer (100 mM, pH 7.4) with 10% glycerol (v/v) was used to equilibrate the SEC  
335 column and CEX elute (1% of column volume) was injected at 45 min retention time. The SEC  
336 output was fractionated, and each fraction was analysed using analytical SEC. Purified  
337 monomer and dimer fractions were used for further analysis.

338 **Immunoblotting.** Purified SARS-CoV-2 N protein was electrophoresed on 4-12% SDS-PAGE  
339 (Bio-Rad) and stained with Coomassie Brilliant Blue G-250 (CBBG-250). For the detection of  
340 N protein through immunoblotting, the obtained protein bands were transferred onto a 0.22 µm  
341 nitrocellulose membrane (MDI) using a Trans-Blot Turbo Transfer System (Bio-Rad). The  
342 membrane was blocked with 5% (w/v) skimmed milk in Tris buffered saline-0.05% (v/v)  
343 Tween-20 (TBST) under gentle shaking at room temperature for 1 h. The membrane was then

344 washed thrice with 1X-TBST and incubated with anti-SARS-CoV-2 N protein antibodies  
345 (catalogue No. ab272852, Abcam, 1:1000) in TBST with BSA (2%, w/v). The membrane was  
346 then washed thrice with 1X-TBST. Immunoblot was then incubated with HRP conjugated-goat  
347 anti-human IgG secondary antibodies (Millipore, AP309P) in a dilution of 1:10,000 for 1 h.  
348 The immunoblot was washed thrice with 1X TBST and was visualized on SuperSignal™ West  
349 Pico PLUS Chemiluminescent Substrate (Thermo Fischer Scientific), and chemiluminescent  
350 signals were captured using ImageQuant LAS 500 instrument (GE Healthcare).

351 **Peptide mass fingerprinting.** In-gel digestion with trypsin protocol was followed for mapping  
352 of purified recombinant SARS-CoV-2 N protein<sup>34</sup>. Gel band of interest was excised and  
353 transferred into microcentrifuge tube and destained by incubating for 30 minutes in 100 µL of  
354 50 mM ammonium bicarbonate/acetonitrile (1:1, v/v) with vortexing. Then the gel pieces were  
355 incubated and vortexed in 200 µL of acetonitrile. Trypsin (Agilent Technologies, California,  
356 USA) was added and incubated at 37 °C for 12-14 hrs. Peptides were extracted by adding 100  
357 µL of 1:2 solution of 5% formic acid and acetonitrile and incubated for 15 mins in a shaker at  
358 37 °C. The liquid obtained was evaporated by Speed-Vac vacuum centrifuge and was  
359 reconstituted in the 0.1% formic acid for the LC-MS. Digested peptides were separated on a  
360 C18 column (Advance Bio Peptide mapping Plus C18, 2.7 µm, 2.1 X 150 mm) using Agilent  
361 1260 HPLC with detector at 214 nm. Column temperature was maintained at 55 °C. The  
362 column was equilibrated with 98% solvent A (0.1% TFA in water) and 2% solvent B (0.1%  
363 TFA in acetonitrile) for 10 min with a flow rate of 0.5 mlmin<sup>-1</sup>. Elution was achieved with a  
364 linear gradient of 2–45% B for 45 min followed by 45–60% B for 10 min, then linear gradient  
365 to 100% B for 10 min. Column was cleaned with 100% B for 10 min followed by equilibration  
366 with 98% A for 10 min. LC was coupled with ESI-TOF (Agilent Technologies, California  
367 USA) and TIC were recorded for m/z 100-3200. The capillary was set at a temperature of 300

368 °C with a gas flow rate of 8 L/min and nebulizer at 35 psig in positive ion mode. MS spectrum  
369 was analysed with Agilent MassHunter Qualitative analysis software (B.07.00).

370 **Molecular mass identification of monomer and dimer form of N protein.** SEC was  
371 performed on Dionex Ultimate 3000 HPLC (Thermo Scientific, Sunnyvale, CA, USA) with  
372 Superdex 200 (Cytiva, Marlborough, USA) maintained at 25°C. The column was equilibrated  
373 with 50 mM phosphate buffer of pH 6.8, 300 mM NaCl salt concentration and 0.02% sodium  
374 azide at a flow rate of 0.5 ml/min. Both the fractions of the purified N protein were injected  
375 and run for 50 min at a flow rate of 0.5 mL/min and detected at 280 nm. SEC was coupled with  
376 MALS from Wyatt technologies, CA, USA, to confirm the molecular mass of the monomer  
377 and dimer fractions. All the buffers were filtered through a 0.22 µm membrane (Pall Life  
378 Sciences, NY, USA).

379 **Circular dichroism spectroscopy.** Circular dichroism spectra were recorded with a Jasco J-  
380 1500 spectrophotometer (Jasco Inc., Maryland, U.S). Secondary structure was measured in the  
381 Far-UV range from 195-250 nm with a 1 nm step size. Data were normalized by subtracting  
382 the baseline with the buffer and smoothed with Savitzky–Golay smoothing filter.

383 **Fluorescence spectroscopy.** Fluorescence spectroscopy was performed on a Cary Eclipse  
384 Fluorescence Spectrophotometer (Agilent Technologies, Santa Clara, California, United  
385 States) using Costar 96-well black polystyrene plate. The tryptophan fluorescence was  
386 recorded with excitation at 285 nm and emission between 300-500 nm. Slits for both excitation  
387 and emission were 5 nm.

388 **Enzyme linked immunosorbent assay.** The fraction of dimeric form of purified N protein of  
389 SARS-CoV-2 was diluted at 10 ngµL<sup>-1</sup> in 0.05 M carbonate-bicarbonate buffer, pH 9.6. The  
390 diluted protein was coated in an increasing gradient (25-200 ng well<sup>-1</sup>) on a 96-microtiter  
391 ELISA plate (Nunc, Thermo Fisher Scientific) overnight at 4°C. On the subsequent day,

392 unbound protein was removed, and wells were washed thrice with 1X TBST buffer. Wells were  
393 then blocked with 4% (w/v) skimmed milk prepared in 1X TBST buffer and incubated at 37°C  
394 for 1 h. The anti-SARS-CoV-2 N protein antibodies (Abcam) were diluted in 1X TBST and  
395 100 µL of the diluted antibodies were allowed to interact with the coated N protein in the  
396 ELISA wells at 37°C for 1 h. Wells were then washed with 200 µL of 1X TBST buffer three  
397 times followed by incubation with 100 µL of goat IgG-HRP antibody (Thermo Fisher  
398 Scientific) prepared in 1X TBST buffer. The wells were then washed three times with 200 µL  
399 of 1X TBST buffer. One hundred microlitre 3,3',5,5'-tetramethylbenzidine substrate (Thermo  
400 Fisher Scientific) was added to each well and incubated for 10-15 min. The reaction was  
401 stopped by adding 100 µL of 0.18 M sulphuric acid and the optical densities of the plate wells  
402 were measured using Biotek plate reader at 450 nm.

403 **Monomeric/dimeric structure modelling.** The sequence of SARS-CoV-2 N protein was  
404 collected from Uniprot<sup>35</sup> database with uniprot ID: PODTC9. Multi template approach was  
405 used to build the model of SARS-CoV-2 N protein. Modeling of the structure was performed  
406 using the online version of the HHpred<sup>36</sup> tool. This identified the most promising template for  
407 building the structure of the SARS-CoV-2 N protein. Final template-based modeling was  
408 performed using the modeller<sup>37</sup> tool. This resulted in monomeric structure of SARS-CoV-2 N  
409 protein sequence. Dimeric structure was built using the PDB template 6WZO structure<sup>38</sup>.  
410 Pymol tool was used to superimpose the structure of 6WZO and modelled monomeric structure  
411 to build its dimeric form.

412 **Solvent accessible surface area (SASA) calculation.** SASA was calculated for monomeric  
413 and dimeric form using the naccess tool  
414 (<http://www.bioinf.manchester.ac.uk/naccess/nacdownload.html>).

415 **Epitopic prediction.** Discontinuous epitopes were predicted using the 3D structure of a

416 protein. Monomer and dimer were compared using several tools to identify these discontinuous  
417 fragments of the protein that can act as epitopes for antibody binding. Ellipro<sup>39</sup> was first used  
418 for this prediction. The starting residues of 1-48 in the monomer and dimer model protein  
419 structure did not appear as globular and were present at the terminal in extended conformation.  
420 They were not included in epitope prediction to avoid false positives. Later, a similar analysis  
421 was performed with the DiscoTope server. This method predicted the probability of each  
422 residue to be part of an epitope.

### 423 **References:**

- 424 1 Iyer, M. et al. COVID-19: an update on diagnostic and therapeutic approaches. *BMB*  
425 *Rep* 53, 191-205, doi:10.5483/BMBRep.2020.53.4.080 (2020).
- 426 2 Kumar, V., Doshi, K. U., Khan, W. H. & Rathore, A. S. COVID-19 pandemic:  
427 mechanism, diagnosis, and treatment. *Journal of Chemical Technology &*  
428 *Biotechnology* 96, 299-308, doi:https://doi.org/10.1002/jctb.6641 (2021).
- 429 3 Rathore, A. S. Covid 19 – pandemic in India. *Journal of Chemical Technology &*  
430 *Biotechnology* 95, 1841-1841, doi:https://doi.org/10.1002/jctb.6470 (2020).
- 431 4 Mahony, J. B. Detection of Respiratory Viruses by Molecular Methods. *Clinical*  
432 *Microbiology Reviews* 21, 716-747, doi:10.1128/cmr.00037-07 (2008).
- 433 5 Tehrani, Z. R. et al. Specificity and Performance of Nucleocapsid and Spike-based  
434 SARS-CoV-2 Serologic Assays. *medRxiv* (2020).
- 435 6 Yuen, R. et al. SARS-CoV-2 reactive antibodies in unexposed individuals revealed by  
436 a high sensitivity, low noise serologic assay. *medRxiv* (2020).
- 437 7 Satarker, S. & Nampoothiri, M. Structural Proteins in Severe Acute Respiratory  
438 Syndrome Coronavirus-2. *Archives of Medical Research* (2020).

- 439 8 Chang, C.-k., Hou, M.-H., Chang, C.-F., Hsiao, C.-D. & Huang, T.-h. The SARS  
440 coronavirus nucleocapsid protein—forms and functions. *Antiviral research* 103, 39-50  
441 (2014).
- 442 9 Wu, C. et al. Characterization of SARS-CoV-2 N protein reveals multiple functional  
443 consequences of the C-terminal domain. *bioRxiv*, 2020.2011.2030.404905,  
444 doi:10.1101/2020.11.30.404905 (2020).
- 445 10 Chen, C.-Y. et al. Structure of the SARS coronavirus nucleocapsid protein RNA-  
446 binding dimerization domain suggests a mechanism for helical packaging of viral RNA.  
447 *Journal of molecular biology* 368, 1075-1086 (2007).
- 448 11 Jayaram, H. et al. X-Ray Structures of the N- and C-Terminal Domains of a  
449 Coronavirus Nucleocapsid Protein: Implications for Nucleocapsid Formation. *Journal*  
450 *of Virology* 80, 6612-6620, doi:10.1128/jvi.00157-06 (2006).
- 451 12 Takeda, M. et al. Solution structure of the c-terminal dimerization domain of SARS  
452 coronavirus nucleocapsid protein solved by the SAIL-NMR method. *J Mol Biol* 380,  
453 608-622, doi:10.1016/j.jmb.2007.11.093S0022-2836(07)01593-8 [pii] (2008).
- 454 13 Yu, I. M., Oldham, M. L., Zhang, J. & Chen, J. Crystal structure of the severe acute  
455 respiratory syndrome (SARS) coronavirus nucleocapsid protein dimerization domain  
456 reveals evolutionary linkage between corona- and arteriviridae. *J Biol Chem* 281,  
457 17134-17139 (2006).
- 458 14 Nguyen, T. H. V. et al. Structure and oligomerization state of the C-terminal region of  
459 the Middle East respiratory syndrome coronavirus nucleoprotein. *Acta*  
460 *Crystallographica Section D: Structural Biology* 75, 8-15 (2019).
- 461 15 Sabbih, G. O., Korsah, M. A., Jeevanandam, J. & Danquah, M. K. Biophysical analysis  
462 of SARS-CoV-2 transmission and theranostic development via N protein

- 463 computational characterization. *Biotechnol Prog*, e3096,  
464 doi:10.1002/btpr.3096e3096BTPR3096 [pii] (2020).
- 465 16 Luo, H., Chen, J., Chen, K., Shen, X. & Jiang, H. Carboxyl terminus of severe acute  
466 respiratory syndrome coronavirus nucleocapsid protein: self-association analysis and  
467 nucleic acid binding characterization. *Biochemistry* 45, 11827-11835 (2006).
- 468 17 Ye, Q., West, A. M., Silletti, S. & Corbett, K. D. Architecture and self-assembly of the  
469 SARS-CoV-2 nucleocapsid protein. *bioRxiv* (2020).
- 470 18 Timani, K. A. et al. Cloning, sequencing, expression, and purification of SARS-  
471 associated coronavirus nucleocapsid protein for serodiagnosis of SARS. *Journal of*  
472 *clinical virology* 30, 309-312 (2004).
- 473 19 Huergo, L. F. et al. Magnetic bead-based ELISA allow inexpensive, rapid and  
474 quantitative detection of human antibodies against SARS-CoV-2. *medRxiv* (2020).
- 475 20 Dutta, N. K. et al. Search for potential target site of nucleocapsid gene for the design of  
476 an epitope-based SARS DNA vaccine. *Immunol Lett* 118, 65-71,  
477 doi:10.1016/j.imlet.2008.03.003S0165-2478(08)00087-4 [pii] (2008).
- 478 21 Lee, H. K. et al. Detection of antibodies against SARS-Coronavirus using recombinant  
479 truncated nucleocapsid proteins by ELISA. *J Microbiol Biotechnol* 18, 1717-1721,  
480 doi:8112 [pii] (2008).
- 481 22 Liu, W. et al. Evaluation of Nucleocapsid and Spike Protein-Based Enzyme-Linked  
482 Immunosorbent Assays for Detecting Antibodies against SARS-CoV-2. *Journal of*  
483 *Clinical Microbiology* 58, e00461-00420, doi:10.1128/jcm.00461-20 (2020).
- 484 23 Yokoyama, R. et al. Validation of a new automated chemiluminescent anti-SARS-  
485 CoV-2 IgM and IgG antibody assay system detecting both N and S proteins in Japan.  
486 *medRxiv*, 2020.2007.2016.20155796, doi:10.1101/2020.07.16.20155796 (2020).



- 487 24 Makatsa, M. S. et al. SARS-CoV-2 antigens expressed in plants detect antibody  
488 responses in COVID-19 patients. medRxiv, 2020.2008.2004.20167940,  
489 doi:10.1101/2020.08.04.20167940 (2020).
- 490 25 Mazzini, L. et al. Comparative analyses of SARS-CoV-2 binding (IgG, IgM, IgA) and  
491 neutralizing antibodies from human serum samples. bioRxiv, 2020.2008.2010.243717,  
492 doi:10.1101/2020.08.10.243717 (2020).
- 493 26 Bonelli, F. et al. Clinical and Analytical Performance of an Automated Serological Test  
494 That Identifies S1/S2-Neutralizing IgG in COVID-19 Patients Semiquantitatively.  
495 Journal of Clinical Microbiology 58, e01224-01220, doi:10.1128/jcm.01224-20  
496 (2020).
- 497 27 Diego-Martin, B. et al. Pilot production of SARS-CoV-2 related proteins in plants: a  
498 proof of concept for rapid repurposing of indoors farms into biomanufacturing  
499 facilities. bioRxiv, 2020.2010.2013.331306, doi:10.1101/2020.10.13.331306 (2020).
- 500 28 Liu, L. et al. A preliminary study on serological assay for severe acute respiratory  
501 syndrome coronavirus 2 (SARS-CoV-2) in 238 admitted hospital patients. Microbes  
502 Infect 22, 206-211, doi:S1286-4579(20)30086-1 [pii]10.1016/j.micinf.2020.05.008  
503 (2020).
- 504 29 Prince, H. E. et al. Detection of SARS-CoV-2 IgG Targeting Nucleocapsid or Spike  
505 Protein by Four High-Throughput Immunoassays Authorized for Emergency Use.  
506 Journal of Clinical Microbiology 58, e01742-01720, doi:10.1128/jcm.01742-20  
507 (2020).
- 508 30 Jayaram, H. et al. X-ray structures of the N-and C-terminal domains of a coronavirus  
509 nucleocapsid protein: implications for nucleocapsid formation. 80, 6612-6620 (2006).
- 510 31 Zeng, W. et al. Biochemical characterization of SARS-CoV-2 nucleocapsid protein.  
511 Biochemical and biophysical research communications (2020).

- 512 32 Burbelo, P. D. et al. Detection of Nucleocapsid Antibody to SARS-CoV-2 is More  
513 Sensitive than Antibody to Spike Protein in COVID-19 Patients. medRxiv,  
514 doi:2020.04.20.20071423 [pii]10.1101/2020.04.20.20071423 (2020).
- 515 33 Lutomski, C. A., El-Baba, T. J., Bolla, J. R. & Robinson, C. V. Autoproteolytic  
516 Products of the SARS-CoV-2 Nucleocapsid Protein are Primed for Antibody Evasion  
517 and Virus Proliferation. bioRxiv (2020).
- 518 34 Shevchenko, A., Tomas, H., Havli, J., Olsen, J. V. & Mann, M. In-gel digestion for  
519 mass spectrometric characterization of proteins and proteomes. Nature Protocols 1,  
520 2856-2860, doi:10.1038/nprot.2006.468 (2006).
- 521 35 Consortium, U. UniProt: a worldwide hub of protein knowledge. Nucleic acids research  
522 47, D506-D515 (2019).
- 523 36 Söding, J., Biegert, A. & Lupas, A. N. The HHpred interactive server for protein  
524 homology detection and structure prediction. Nucleic acids research 33, W244-W248  
525 (2005).
- 526 37 Webb, B. & Sali, A. Comparative protein structure modeling using MODELLER.  
527 Current protocols in bioinformatics 54, 5.6. 1-5.6. 37 (2016).
- 528 38 Ye, Q., West, A. M. V., Silletti, S. & Corbett, K. D. Architecture and self-assembly of  
529 the SARS-CoV-2 nucleocapsid protein. bioRxiv, doi:2020.05.17.100685  
530 [pii]10.1101/2020.05.17.100685 (2020).
- 531 39 Ponomarenko, J. et al. ElliPro: a new structure-based tool for the prediction of antibody  
532 epitopes. BMC bioinformatics 9, 514 (2008).

533

534 **Acknowledgments:** Authors acknowledge the Microsoft CSR for financial support of the  
535 study.

536 **Author contributions:**

537 A.S.R., W.H.K., R.B. designed the study. W.H.K., N.K., S.G., V.B., and D.M performed the  
538 experiments. W.H.K., N.K., S.G, V.B., A.M., D.M. and R.B. analysed and interpreted data.  
539 A.M. performed the bioinformatics work. W.H.K., N.K., S.G., V.B., and A.M., wrote the  
540 original manuscript. A.S.R. supervised the project and was the recipient of the funding. All  
541 authors were involved in the drafting, review, and approval of the report and the decision to  
542 submit for publication.

543

544 **Competing interests:**

545 The authors declare that they do not have any competing interests.

546

547 **Additional information:**

548 Supplementary information of Table S1 is attached with the manuscript.

549

550

551
